# Supplementary material for: Rheological characterization of ionic liquids and ionic liquid crystals with promising tribological performance
Source: Royal Society of Chemistry journal article supplement (doi:10.1039/c2sm26030a), 2012-01-01
Supplement: c2sm26030a.pdf [file c2sm26030a.pdf]

# Rheological characterization of ionic liquids and ionic liquid crystals with promising tribological performance

Tobias Amann,<sup>\*a</sup> Christian Dold<sup>a</sup> and Andreas Kailer<sup>a</sup>

## 1 Electronic Supplementary Information

### 1.1 Values of the dynamic viscosities

**Table 1** Viscosity values of the ionic liquids (90 °C) and ionic liquid crystals (90 °C and 120 °C) at high shear rate ( $\dot{\gamma} = 1000\text{s}^{-1}$ , gap: 0.052 mm, cone: CP50-2/TP)

| Ionic Liquids                                                | Dyn. viscosity / $\text{mPa} \cdot \text{s}$ |        |
|--------------------------------------------------------------|----------------------------------------------|--------|
|                                                              | 90 °C                                        | 120 °C |
| $[\text{C}_2\text{mim}][\text{PF}_6]$                        | 16                                           | -      |
| $[\text{C}_2\text{mim}][(\text{CF}_3\text{SO}_2)_2\text{N}]$ | 7                                            | -      |
| $[\text{C}_4\text{mim}][\text{PF}_6]$                        | 21                                           | -      |
| $[\text{C}_8\text{mim}][\text{PF}_6]$                        | 34                                           | -      |
| $[\text{C}_8\text{mim}][(\text{CF}_3\text{SO}_2)_2\text{N}]$ | 12                                           | -      |
| $[\text{C}_{12}\text{mim}][\text{PF}_6]$                     | 60                                           | -      |
| $[\text{C}_{12}\text{mim}][\text{Cl}]$                       | 861                                          | 75     |
| $[\text{C}_{12}\text{mim}][\text{Br}]$                       | 719                                          | 65     |

<sup>a</sup> Fraunhofer Institute for Mechanics of Materials IWM, Woehlerstraße 11, 79108 Freiburg, Germany. Fax: +49 7615142-510; Tel: +49 7615142-208; E-mail: tobias.amann@iwm.fraunhofer.de

## 1.2 Yield-stress, frequency sweeps and relaxation measurements

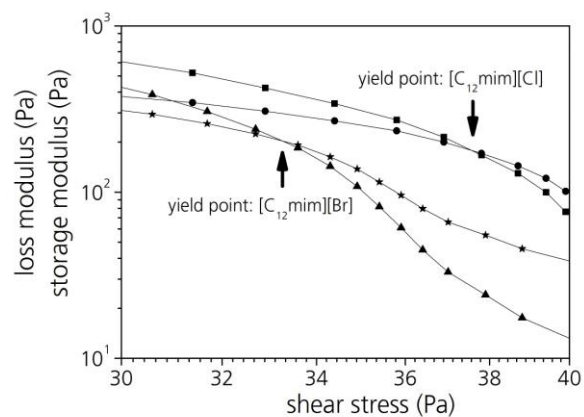

**Fig. 1** Comparison of the yield-stress of  $[C_{12}mim][Cl]$  and  $[C_{12}mim][Br]$  measured in oscillatory mode with plate-plate configuration at  $90^\circ C$  and 1.0mm gap

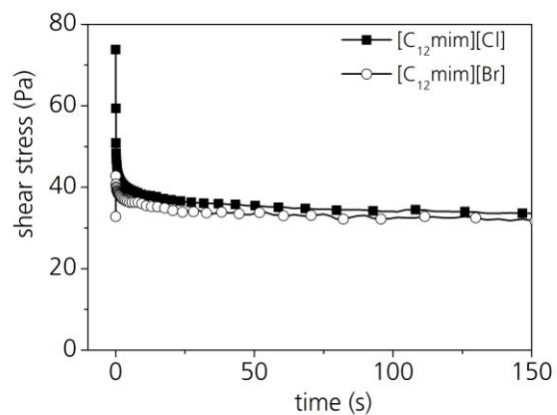

**Fig. 2** Comparison of the relaxation of  $[C_{12}mim][Cl]$  and  $[C_{12}mim][Br]$  with constant deformation of 10% using plate-plate configuration at  $90^\circ C$  and 1.0mm gap

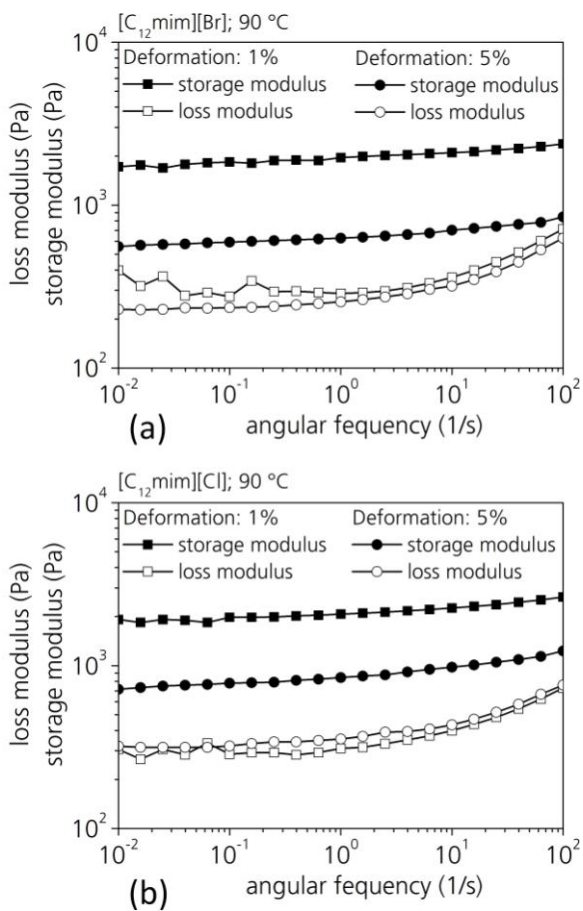

**Fig. 3** Frequency sweeps with 1% and 5% deformation of a)  $[C_{12}mim][Br]$  and b)  $[C_{12}mim][Cl]$  measured in oscillatory mode with plate-plate configuration at 90 °C and 1.0mm gap
